# Supplementary material for: Effect of the Addition of Polyacrylic Acid of Different Molecular Weights to Coagulation Bath on the Structure and Performance of Polysulfone Ultrafiltration Membranes
Source: MDPI journal article supplement (doi:10.3390/polym15071664), 2023-03-27
Supplement: s1 [file s1]

## Supplementary materials

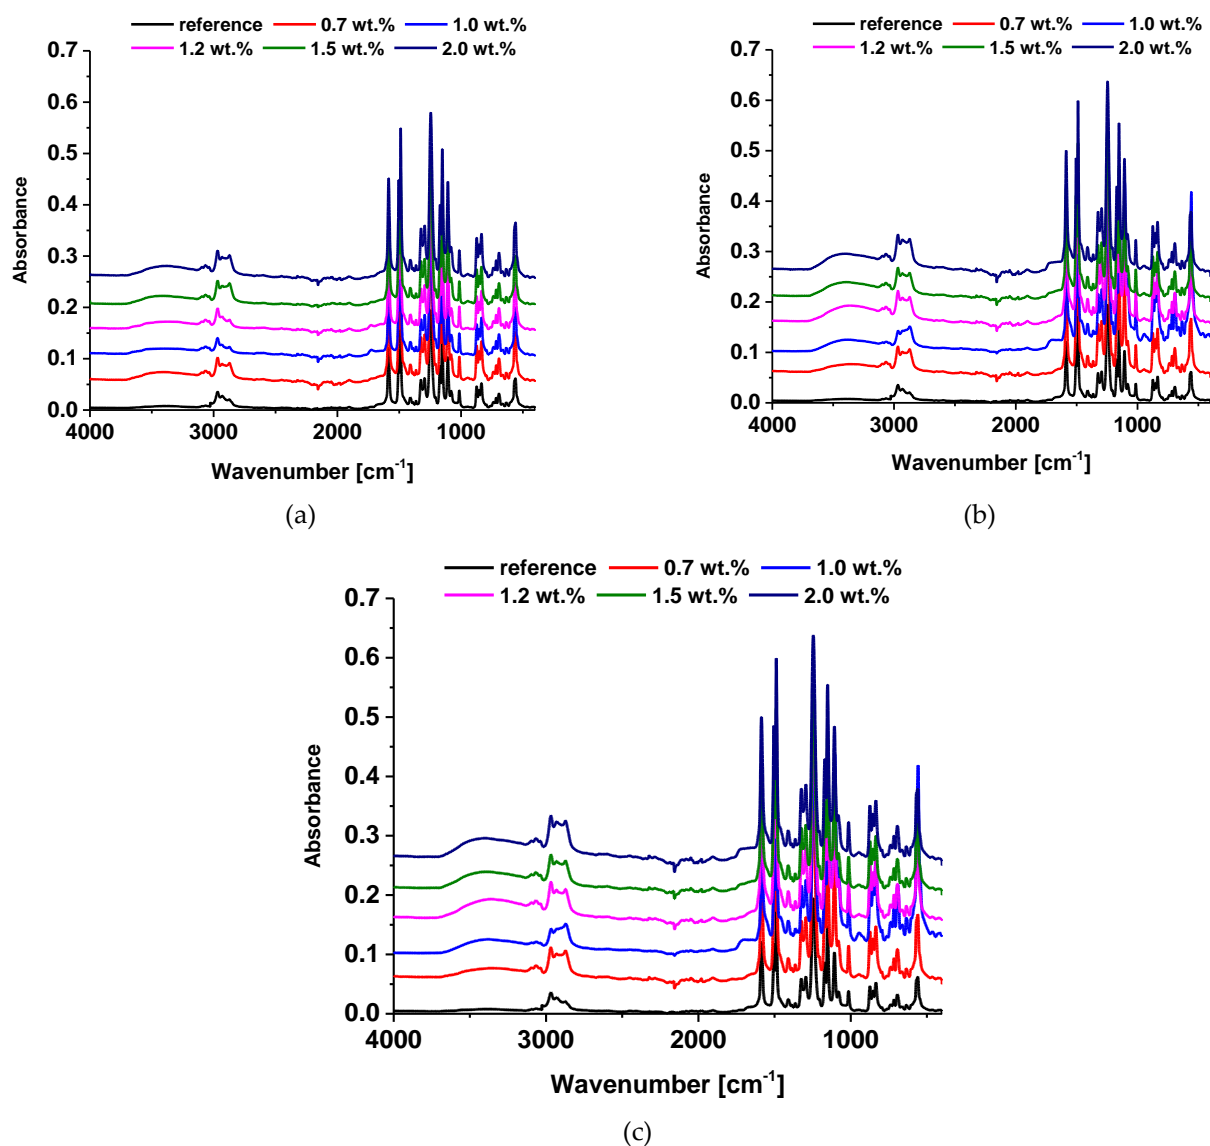

**Figure S1.** FTIR spectra of PSF and PSF/PAA membranes depending on the concentration of PAA in the coagulation bath, PAA molecular weight, g·mol<sup>-1</sup>: a – 100,000; b – 250,000; c – 450,000.
